# Supplementary material
Source: PubMed Central journal article supplement (PMC9133104)
Supplement: NIHMS1783792-supplement-Supplemental_Publication_Material.pdf [file NIHMS1783792-supplement-Supplemental_Publication_Material.pdf]

## **SUPPLEMENTAL MATERIAL**

### **Systematic Review of the Evidence for Stroke Family Caregiver and Dyad Interventions**

Tamilyn Bakas, PhD, RN, FAHA, FAAN<sup>1</sup>

Michael J. McCarthy, PhD, MSW<sup>2</sup>

Elaine L. Miller, PhD, RN, CRRN, FAHA, FAAN<sup>1</sup>

#### **Affiliations**

<sup>1</sup> University of Cincinnati College of Nursing, Cincinnati, OH.

<sup>2</sup> Northern Arizona University, Department of Social Work, Flagstaff, AZ.

#### **Online Supplement: Supplemental Tables S1-S3**

Supplemental Table S1. Search strategy text used for each database.

Supplemental Table S2. Summary of 10 Articles Testing Family Caregiver Interventions.

Supplemental Table S3. Summary of 8 Articles Testing Dyad Interventions.

**References: 19 - 36**

**Supplemental Table S1.** Search Strategy Text used for each database.

| <b>Database</b>              | <b>Search String</b>                                                                                           | <b>Limiters</b>               | <b>Expanders</b>                      |
|------------------------------|----------------------------------------------------------------------------------------------------------------|-------------------------------|---------------------------------------|
| EBSCOhost<br>CINAHL          | ((stroke AND family) OR caregiver) AND (interventions OR (experimental studies OR quasi-experimental studies)) | 2016-12-01 through 2021-03-31 | Related words,<br>Equivalent subjects |
| PsycINFO                     | ((stroke AND family) OR caregiver) AND (interventions OR (experimental studies OR quasi-experimental studies)) | 2016-12-01 through 2021-03-31 | Related words,<br>Equivalent subjects |
| PubMed (includes<br>MEDLINE) | ((stroke AND family) OR caregiver) AND (interventions OR (experimental studies OR quasi-experimental studies)) | 2016-12-01 through 2021-03-31 | Related words,<br>Equivalent subjects |

**Supplemental Table S2. Summary of 10 Articles Testing Family Caregiver Interventions.**

| Author(s)<br>(year)<br>Country                | Sample                                                          | Design | Skill-<br>building                              | Psycho-<br>educa-<br>tion | Support | Face-<br>to-<br>Face | Tele-<br>phone | Web | Total<br># ses-<br>sions | Survivor outcomes<br>(p<.05)                                              | Caregiver outcomes<br>(p<.05)                                                                                                                                                                                                                                                                                                                                                                  |
|-----------------------------------------------|-----------------------------------------------------------------|--------|-------------------------------------------------|---------------------------|---------|----------------------|----------------|-----|--------------------------|---------------------------------------------------------------------------|------------------------------------------------------------------------------------------------------------------------------------------------------------------------------------------------------------------------------------------------------------------------------------------------------------------------------------------------------------------------------------------------|
| Cheng et al.,<br>2018<br>China <sup>19</sup>  | N=142<br>T=64<br>U=64                                           | RCT    | X<br>hands on<br>skills &<br>problem<br>solving | X                         |         | 2                    | 6              |     | 8                        | <b>NS Findings</b><br>Survivor's placement<br>to residential care<br>home | *Competence T1,<br>1mo, 3mo<br>Problem solving, T1,<br>1mo, 3mo<br>Social Support<br>Number 3mo<br>Social Support<br>Satisfaction 3mo<br>Family functioning<br>1mo<br>Burden 3mo<br><b>NS Findings</b><br>Depressive symptoms<br>Social Support<br>Number T1, 1mo<br>Social Support<br>Satisfaction T1, 1mo<br>Family functioning T1,<br>3mo<br>Perceived physical<br>health<br>Burden T1, 1mo |
| Fu et al.,<br>2020<br>China <sup>20</sup>     | N=68<br>T=34<br>C=34                                            | RCT    | X stress                                        | X<br>Tailored             |         | 9                    |                |     | 9                        | Quality of life                                                           | Benefit finding<br>Burden<br>Quality of life                                                                                                                                                                                                                                                                                                                                                   |
| LeLaurin et<br>al., 2021<br>USA <sup>21</sup> | N=53<br>T=13<br>(4wk)<br>T=13<br>(8wk)<br>C=13<br>(8wk)<br>U=14 | RCT    | X<br>problem<br>solving                         | X<br>Tailored             |         |                      | 4 or 8         |     | 4 or 8                   |                                                                           | <b>NS Findings</b><br>*Depressive<br>symptoms<br>Burden<br>(not powered for<br>significance due to<br>small sample size)                                                                                                                                                                                                                                                                       |

| Author(s)<br>(year)<br>Country                              | Sample                                                                                    | Design                               | Skill-<br>building                | Psycho-<br>educa-<br>tion | Support | Face-<br>to-<br>Face | Tele-<br>phone | Web | Total<br># ses-<br>sions                    | Survivor outcomes<br>(p<.05)                                                        | Caregiver outcomes<br>(p<.05)                                                                                                                                                                                                                                                                            |
|-------------------------------------------------------------|-------------------------------------------------------------------------------------------|--------------------------------------|-----------------------------------|---------------------------|---------|----------------------|----------------|-----|---------------------------------------------|-------------------------------------------------------------------------------------|----------------------------------------------------------------------------------------------------------------------------------------------------------------------------------------------------------------------------------------------------------------------------------------------------------|
| Mores et al.,<br>2018<br>Canada <sup>22</sup>               | N=42<br>T=42                                                                              | Quasi<br>single<br>group<br>pre-post | X                                 | X<br>Tailored             |         | 4<br>varied          |                |     | 4<br>varied                                 |                                                                                     | Life changes<br>Burden, time<br><b>NS Findings</b><br>Burden, Difficulty                                                                                                                                                                                                                                 |
| Moreira et al.,<br>2018<br>Brazil <sup>23</sup>             | N=33<br>T=11<br>T=11<br>U=11                                                              | RCT                                  | X hands<br>on                     | X                         |         | 1                    |                |     | 1                                           |                                                                                     | Pain reduction in<br>neck, R shoulder, both<br>knees.<br>Physical health<br>Social relations<br>(several within group<br>differences found)<br><b>NS Findings</b><br>Pain other areas<br>*Q1 & Q2 WhoQOL<br>Psychological<br>Environment<br>Perceived Stress<br>(several NS within<br>group differences) |
| Patchwood et<br>al, 2021<br>United<br>Kingdom <sup>24</sup> | N=36<br>clusters<br>(N=349)<br>T=18<br>Clusters<br>(n=175)<br>U=18<br>clusters<br>(n=174) | Cluster<br>RCT                       | X action<br>plan                  | X<br>Assess<br>Tailored   |         | 1                    |                |     | 1                                           |                                                                                     | <b>NS Findings</b><br>*Carer strain<br>Carer distress<br>Positive appraisal<br>Anxiety<br>Depression<br>EQ-5D quality of life                                                                                                                                                                            |
| Walker et al.,<br>2020<br>United<br>Kingdom <sup>25</sup>   | N=35<br>T=18<br>U=17                                                                      | RCT                                  | X<br>problem<br>solving<br>stress | X                         |         | 6                    |                |     | 6<br>choice<br>group<br>or one<br>on<br>one | Significance not tested<br>due to small sample<br>size. Descriptive data<br>trends. | Significance not tested<br>due to small sample<br>size. Descriptive data<br>trends.                                                                                                                                                                                                                      |

| Author(s)<br>(year)<br>Country                 | Sample                | Design | Skill-<br>building  | Psycho-<br>educa-<br>tion                       | Support | Face-<br>to-<br>Face                                              | Tele-<br>phone | Web | Total<br># ses-<br>sions                                                      | Survivor outcomes<br>(p<.05)                  | Caregiver outcomes<br>(p<.05)                                                                                                                                          |
|------------------------------------------------|-----------------------|--------|---------------------|-------------------------------------------------|---------|-------------------------------------------------------------------|----------------|-----|-------------------------------------------------------------------------------|-----------------------------------------------|------------------------------------------------------------------------------------------------------------------------------------------------------------------------|
| Wang et al.,<br>2021<br>China <sup>26</sup>    | N=110<br>T=55<br>C=55 | RCT    | X<br>relaxatio<br>n | X                                               |         | 24                                                                |                |     | 24                                                                            |                                               | Anxiety 6&12mo<br>Depression 6&12mo<br>Burden 6 & 12mo<br>Care burden 12mo<br><b>NS Findings</b><br>Anxiety 3mo<br>Depression 3mo<br>Burden 3mo<br>Care burden 3&6, mo |
| Yilmaz et al.,<br>2019<br>Turkey <sup>27</sup> | N=44<br>T=23<br>U=21  | RCT    | X<br>relaxatio<br>n |                                                 |         | 1<br>trainin<br>g                                                 | 14             |     | 1<br>trainin<br>g,<br>then 2<br>x /wk<br>for 8<br>wks                         |                                               | Burden (within)<br>Depression (within)<br><b>NS Findings</b><br>Burden (between)<br>Depression (between)                                                               |
| Zhang et al.,<br>2019<br>China <sup>28</sup>   | N=196<br>T=98<br>U=98 | RCT    | X stress            | X<br>Assess<br>Tailored<br>based on<br>survivor |         | 2<br>Weekl<br>y in<br>hosp<br>Every<br>2<br>weeks<br>post<br>hosp |                |     | 2 plus<br>additi<br>onal<br>in<br>hosp<br>and<br>post<br>hosp<br>(varie<br>s) | Cognitive impairment<br>Depression<br>Anxiety |                                                                                                                                                                        |

N = Number of subjects; T = Treatment Group; C = Control Group; U = Usual care; cg = caregiver; pt = patient; NS = Not significant.  
All listed outcomes indicate improvement unless listed under NS Findings. \* denotes outcomes that were identified as primary outcomes.

**Supplemental Table S3. Summary of 8 Articles Testing Dyad Interventions.**

| Author(s)<br>(year)<br>Country                | Sample                                                                                       | Design                                                     | Skill-<br>building    | Psycho-<br>educa-<br>tion | Support | Face-<br>to-<br>Face | Tele-<br>phone | Web                           | Total<br># ses-<br>sions | Survivor outcomes<br>(p<.05)                                                                                                                                                          | Caregiver outcomes<br>(p<.05)                                                                      |
|-----------------------------------------------|----------------------------------------------------------------------------------------------|------------------------------------------------------------|-----------------------|---------------------------|---------|----------------------|----------------|-------------------------------|--------------------------|---------------------------------------------------------------------------------------------------------------------------------------------------------------------------------------|----------------------------------------------------------------------------------------------------|
| Bannon et al., 2020<br>USA <sup>29</sup>      | N=17<br>dyads<br>T=7<br>C=10                                                                 | RCT                                                        | X                     | X<br>Assess<br>Tailored   |         | 2                    |                | 4<br>Video-<br>conf           | 6                        | Significance not tested due to small sample size. Descriptive data trends and Cohen's d.                                                                                              | Significance not tested due to small sample size. Descriptive data trends and Cohen's d.           |
| Blanton et al., 2019<br>USA <sup>30</sup>     | N=7<br>dyads                                                                                 | Quasi<br>(single<br>group)                                 | X                     | X                         |         | 10                   |                |                               | 10                       | Significance not tested due to small sample size. Descriptive data trends.                                                                                                            | Significance not tested due to small sample size. Descriptive data trends.                         |
| McCarthy et al., 2020<br>USA <sup>31</sup>    | N=16<br>dyads<br>T=8<br>C=8                                                                  | RCT                                                        | X                     | X<br>Assess<br>Tailored   |         | X<br>varied          | X<br>Varied    | X<br>Video-<br>conf<br>Varied | 8<br>mode<br>varied      | Significance not tested due to small sample size. Descriptive data trends.                                                                                                            | Significance not tested due to small sample size. Descriptive data trends.                         |
| Mei et al., 2018<br>China <sup>32</sup>       | N=12<br>clusters<br>N=75<br>dyads<br>(spousal)<br>T=25<br>(dyad)<br>T=22<br>(spouse)<br>U=28 | RCT<br>Cluster<br>by<br>health<br>service<br>provide<br>rs | X<br>reminisc<br>ence | X<br>Assess               |         | 8                    |                |                               | 8                        | Increased life satisfaction                                                                                                                                                           | Decreased burden<br>Increased positive aspects<br>Increased life satisfaction                      |
| Orlowska et al., 2018<br>Poland <sup>33</sup> | N=150<br>dyads<br>T=80<br>C=80<br><br>FAP<br>T=20<br>C=20<br>FAPS<br>T=20                    | RCT                                                        |                       | X                         |         | 10<br>group          |                |                               | 10<br>group              | Survivors with <u>fluent</u> aphasia (FAP)<br>- Increased support toward and from spouse<br>- Lower depreciation toward spouse<br><br>Survivors with <u>non-fluent</u> aphasia (NFAP) | <u>Spouses</u> of survivors with <u>fluent</u> aphasia (FAPS)<br>- Increased support from survivor |

| Author(s)<br>(year)<br>Country | Sample                                                | Design | Skill-<br>building | Psycho-<br>educa-<br>tion | Support | Face-<br>to-<br>Face | Tele-<br>phone | Web | Total<br># ses-<br>sions | Survivor outcomes<br>(p<.05)                                                                                                                                                                                                                                                                                                                                                                                                                                 | Caregiver outcomes<br>(p<.05)                                                                                                                                                                                                                                                                                                                                                                                                                                                                                                                                                                                                                                                                                                                                                                                 |
|--------------------------------|-------------------------------------------------------|--------|--------------------|---------------------------|---------|----------------------|----------------|-----|--------------------------|--------------------------------------------------------------------------------------------------------------------------------------------------------------------------------------------------------------------------------------------------------------------------------------------------------------------------------------------------------------------------------------------------------------------------------------------------------------|---------------------------------------------------------------------------------------------------------------------------------------------------------------------------------------------------------------------------------------------------------------------------------------------------------------------------------------------------------------------------------------------------------------------------------------------------------------------------------------------------------------------------------------------------------------------------------------------------------------------------------------------------------------------------------------------------------------------------------------------------------------------------------------------------------------|
|                                | C=20<br>NFAP<br>T=20<br>C=20<br>NFAPS<br>T=20<br>C=20 |        |                    |                           |         |                      |                |     |                          | <ul style="list-style-type: none"> <li>- Increased support from spouse</li> <li>- Increased engagement from spouse</li> <li>- Lower depreciation toward and from spouse</li> </ul> <p><b>NS Findings</b><br/>Survivors with <u>fluent</u> aphasia (FAP)</p> <ul style="list-style-type: none"> <li>- Engagement toward and from spouse</li> <li>-Depreciation from spouse</li> </ul> <p>FAP plus NFAP<br/><u>combined:</u><br/>-Engagement toward spouse</p> | <p><u>Spouses</u> of survivors with <u>non-fluent</u> aphasia (NFAPS)</p> <ul style="list-style-type: none"> <li>- Increased support from survivor</li> <li>- Increased engagement toward and from survivor</li> </ul> <p><b>NS Findings</b><br/><u>Spouses</u> of survivors with <u>fluent</u> aphasia (FAPS)</p> <ul style="list-style-type: none"> <li>-Support toward survivor</li> <li>- Engagement toward and from survivor</li> <li>- Depreciation toward and from survivor</li> </ul> <p><u>Spouses</u> of survivors with <u>non-fluent</u> aphasia (NFAPS)</p> <ul style="list-style-type: none"> <li>-Support toward survivor</li> <li>-Depreciation toward and from survivor</li> </ul> <p>FAPS plus NFAPS<br/><u>combined:</u><br/>-Support toward survivor<br/>-Depreciation toward and from</p> |

| Author(s)<br>(year)<br>Country               | Sample                                                                                                                             | Design                    | Skill-<br>building | Psycho-<br>educa-<br>tion                                | Support | Face-<br>to-<br>Face | Tele-<br>phone | Web | Total<br># ses-<br>sions | Survivor outcomes<br>(p<.05)                                                                                                                                                                                                                       | Caregiver outcomes<br>(p<.05)                                                                                                                                                                                                                                         |
|----------------------------------------------|------------------------------------------------------------------------------------------------------------------------------------|---------------------------|--------------------|----------------------------------------------------------|---------|----------------------|----------------|-----|--------------------------|----------------------------------------------------------------------------------------------------------------------------------------------------------------------------------------------------------------------------------------------------|-----------------------------------------------------------------------------------------------------------------------------------------------------------------------------------------------------------------------------------------------------------------------|
| Rasmus et al., 2020<br>Poland <sup>34</sup>  | N=150<br>dyads<br>T=80<br>C=80<br><br>FAP<br>T=20<br>C=20<br>FAPS<br>T=20<br>C=20<br>NFAP<br>T=20<br>C=20<br>NFAPS<br>T=20<br>C=20 | RCT                       |                    | X                                                        |         | 10<br>group          |                |     | 10<br>group              | FAP plus NFAP<br>combined, time by<br>therapy interaction:<br><br>-Overall relationship<br>quality<br>-Relationship<br>consensus<br>-Relationship<br>satisfaction<br>-Affectional<br>expression<br><br><b>NS Findings</b><br>Relationship cohesion | FAPS plus NFAPS<br>combined, time by<br>therapy interaction:<br><br>- Overall relationship<br>quality<br>- Relationship<br>consensus<br><br><b>NS Findings</b><br>-Relationship<br>cohesion<br>- Relationship<br>satisfaction<br>- Affectional<br>expression          |
| Terrill et al,<br>2018<br>USA <sup>35</sup>  | N=11<br>dyads<br>T=11                                                                                                              | Quasi-<br>single<br>group | X stress,<br>goal  |                                                          |         | 1                    |                |     | 1                        | Significance not tested<br>due to small sample<br>size. Descriptive data<br>trends.                                                                                                                                                                | Significance not tested<br>due to small sample<br>size. Descriptive data<br>trends.                                                                                                                                                                                   |
| Ugur et al.,<br>2019<br>Turkey <sup>36</sup> | N=86<br>T=43<br>U=43                                                                                                               | RCT                       |                    | X<br>Assess<br>Tailored<br>based on<br>survivor<br>needs |         | 5                    |                |     | 5                        |                                                                                                                                                                                                                                                    | Burden (between<br>group post-test)<br>Quality of life mental<br>role and vitality<br>(between group post-<br>test)<br><b>NS Findings</b><br>Quality of life general<br>health, physical<br>function, physical role,<br>social function, pain<br>and mental function. |

N = Number of subjects; T = Treatment Group; C = Control Group; U = Usual care; cg = caregiver; pt = patient; NS = Not significant.  
All listed outcomes indicate improvement unless listed under NS Findings. \* denotes outcomes that were identified as primary outcomes.
